# Supplementary material for: Central FGF21 production regulates memory but not peripheral metabolism
Source: PubMed Central journal article supplement — Cell Rep. Author manuscript; Available in PMC 2022 Sep 14. (PMC9472585; doi:10.1016/j.celrep.2022.111239), 2022-08-23
Supplement: NIHMS1832198-supplement-1.pdf [file NIHMS1832198-supplement-1.pdf]

**Cell Reports, Volume 40**

**Supplemental information**

**Central FGF21 production regulates  
memory but not peripheral metabolism**

**Bolu Zhou, Kristin E. Clafin, Kyle H. Flippo, Andrew I. Sullivan, Arvand Asghari, Satya M. Tadinada, Sharon O. Jensen-Cody, Ted Abel, and Matthew J. Potthoff**

## Supplemental Figures

### Figure S1, related to Figure 1, FGF21 is expressed in the retrosplenic cortex but not the hypothalamus.

(A-B) Relative *Fgf21*(A) and *Cre* (B) mRNA levels from the liver of 10-12 week old male *Fgf21*-P2A-CRE mice and CRE negative littermate *ad libitum* fed or following a 24-hour fast (n=5-6/group). Statistical analyses were conducted using a two-way ANOVA with multiple comparisons (\* =  $p < 0.05$ ).

(C) Representative fluorescence imaging for tdTomato-positive cells in the pancreas of 12-week-old male *Fgf21*-P2A-CRE;Ai-tdTomato mice. Scale bar = 500  $\mu$ m.

(D) Representative fluorescence imaging for tdTomato-positive cells in the medial hypothalamus of female *Fgf21*-P2A-CRE;Ai14-tdTomato and CRE negative control mice following a 24-hour fast. Scale bars = 250  $\mu$ m.

(E) RNAscope *in situ* hybridization for *Fgf21* and *tdTomato* mRNA in retrosplenic cortex (RSC) and hypothalamus from *Fgf21*-P2A-CRE;Ai-tdTomato mice. 3V = third ventricle. Scale bars = 75  $\mu$ m.

(F) Representative immunofluorescence imaging for FGF21 and vimentin in the median eminence of male wild-type mice using primary (Rabbit anti-FGF21; Chicken anti-vimentin) and secondary (FGF21, Goat anti-Rabbit IgG (H+L) Cross-Absorbed Secondary Antibody Texas Red; Vimentin, Goat anti-Chicken IgY (H+L) Secondary Antibody Alexa Fluor 488) antibodies or FGF21 secondary antibody only.

(G) In silico single cell analysis of *Fgf21* expression in the hypothalamus in the indicated cell types.

(H) In silico single cell analysis of *Fgf21*-expressing cells in the thalamus based on the indicated marker genes.

Values are mean  $\pm$  SEM.

**Figure S2, related to Figure 2, Neuron-derived FGF21 does not regulate energy homeostasis.**

(A) Representative fluorescence imaging for GFP-positive cells in 12-week-old FGF21<sup>fl/fl</sup>;PHP.eB-eGFP-CRE mice. Scale bar = 1 mm.

(B) Daily measurement of sucrose intake during two-bottle choice of 10% sucrose versus water in male FGF21<sup>fl/fl</sup> mice injected with AAV-TBG-Con (null) or AAV-TBG-CRE virus (n=10/group). Statistical analyses were conducted using a two-way ANOVA with multiple comparisons (\* =  $p < 0.05$ ).

(C-D) Plasma glucose (C) and plasma non-esterified fatty acid (NEFA) (D) levels in *ad libitum* fed and 24 hour fasted male FGF21<sup>fl/fl</sup> mice injected with AAV-TBG-Con (null) or AAV-TBG-CRE virus (n=7-10/group). Statistical analyses were conducted using a two-way ANOVA with multiple comparisons (\* =  $p < 0.05$ ).

(E-F) Linear modeling of energy expenditure of 12-14 week old male FGF21<sup>fl/fl</sup>;PHP.eB-GFP and FGF21<sup>fl/fl</sup>;PHP.eB-CRE mice (n=7-9/group) during the light (E) or dark (F) cycles.

Values are mean  $\pm$  SEM.

**Figure S3, related to Figure 3, Role of FGF21 in learning and memory.**

(A-B) Average of the four trials for latency to the escape chamber during training (A) and primary error to the escape chamber during training (B) in male FGF21<sup>fl/fl</sup> mice injected with PHP.eB-GFP

or PHP.eB-CRE virus (n=7-9/group). Statistical analyses were conducted using a two-way ANOVA with multiple comparisons ( $* = p < 0.05$ ).

(C-D) Average of the four trials for latency to the escape chamber during training (C) and primary error to the escape chamber during training (D) in male FGF21<sup>fl/fl</sup> mice injected with AAV-TBG-Con (null) or AAV-TBG-CRE virus (n=15/group). Statistical analyses were conducted using a two-way ANOVA with multiple comparisons ( $* = p < 0.05$ ).

(E) Representative fluorescent image of viral targeting of AAV-CMV-CRE to the retrosplenial cortex (RSC) of FGF21<sup>fl/fl</sup> mice. Scale bar = 1 mm.

(F-G) Average of the four trials for latency to the escape chamber during training (F) and primary error to the escape chamber during training (G) in male FGF21<sup>fl/fl</sup> mice injected with AAV-CMV-CRE and AAV-CMV-GFP virus in the RSC (n=15/group). Statistical analyses were conducted using a two-way ANOVA with multiple comparisons ( $* = p < 0.05$ ).

(H-J) Escape latency on test trials 24 hours (H), 7 days (I), and 14 days (J) after the training of male FGF21<sup>fl/fl</sup> mice which received stereotaxic injection of AAV-CMV-CRE and AAV-CMV-GFP virus compared to wild-type mice which received AAV-CMV-CRE virus into the retrosplenial cortex (RSC) (n=9-15/group). Statistical analyses were conducted using a two-tailed t test ( $* = p < 0.05$ ).

(K) Representative fluorescent image of viral targeting of AAV-hSyn-CRE-EGFP to the retrosplenial cortex (RSC) of FGF21<sup>fl/fl</sup> mice. Scale bar = 1 mm.

(L-M) Average of the four trials for latency to the escape chamber during training (L) and primary error to the escape chamber during training (M) in male FGF21<sup>fl/fl</sup> mice injected with AAV-hSyn-CRE and control virus in the RSC (n=15-16/group). Statistical analyses were conducted using a two-way ANOVA with multiple comparisons ( $* = p < 0.05$ ).

(N-O) Average of the four trials for latency to the escape chamber during training (N) and primary error to the escape chamber during training (O) in wild-type male mice administered vehicle or FGF21 (1 mg/kg) each day of training (n=14-15/group). Statistical analyses were conducted using a two-way ANOVA with multiple comparisons ( $* = p < 0.05$ ).

(P-R) Escape latency on test trials 24 hours (P), 7 days (Q), and 14 days (R) after the training of 11-13 week old female C57BL/6J mice treated with FGF21 (1 mg/kg) or saline for 4 days via i.p. injection (n=13-15/group). Statistical analyses were conducted using a two-tailed t test ( $* = p < 0.05$ ).

Values are mean  $\pm$  SEM.

**Figure S4, related to Figure 3, FGF21 administration consolidates spatial and fear memory.**

Total freezing time of cued-dependent fear (A) and contextual (B) memory of 10-12 week old male C57BL/6 mice administered FGF21 (1mg/kg) or saline treatment via i.p. injection (n=10/group). Values are mean  $\pm$  SEM.. Statistical analyses were conducted using a two-tailed t test ( $* = p < 0.05$ ).

**Video S1, related to Figure 1, Comprehensive evaluation of FGF21-expressing cells in the CNS.**

Light sheet imaging of a brain from *Fgf21*-CRE;Ai14-tdTomato mice processed by DISCO clearing.

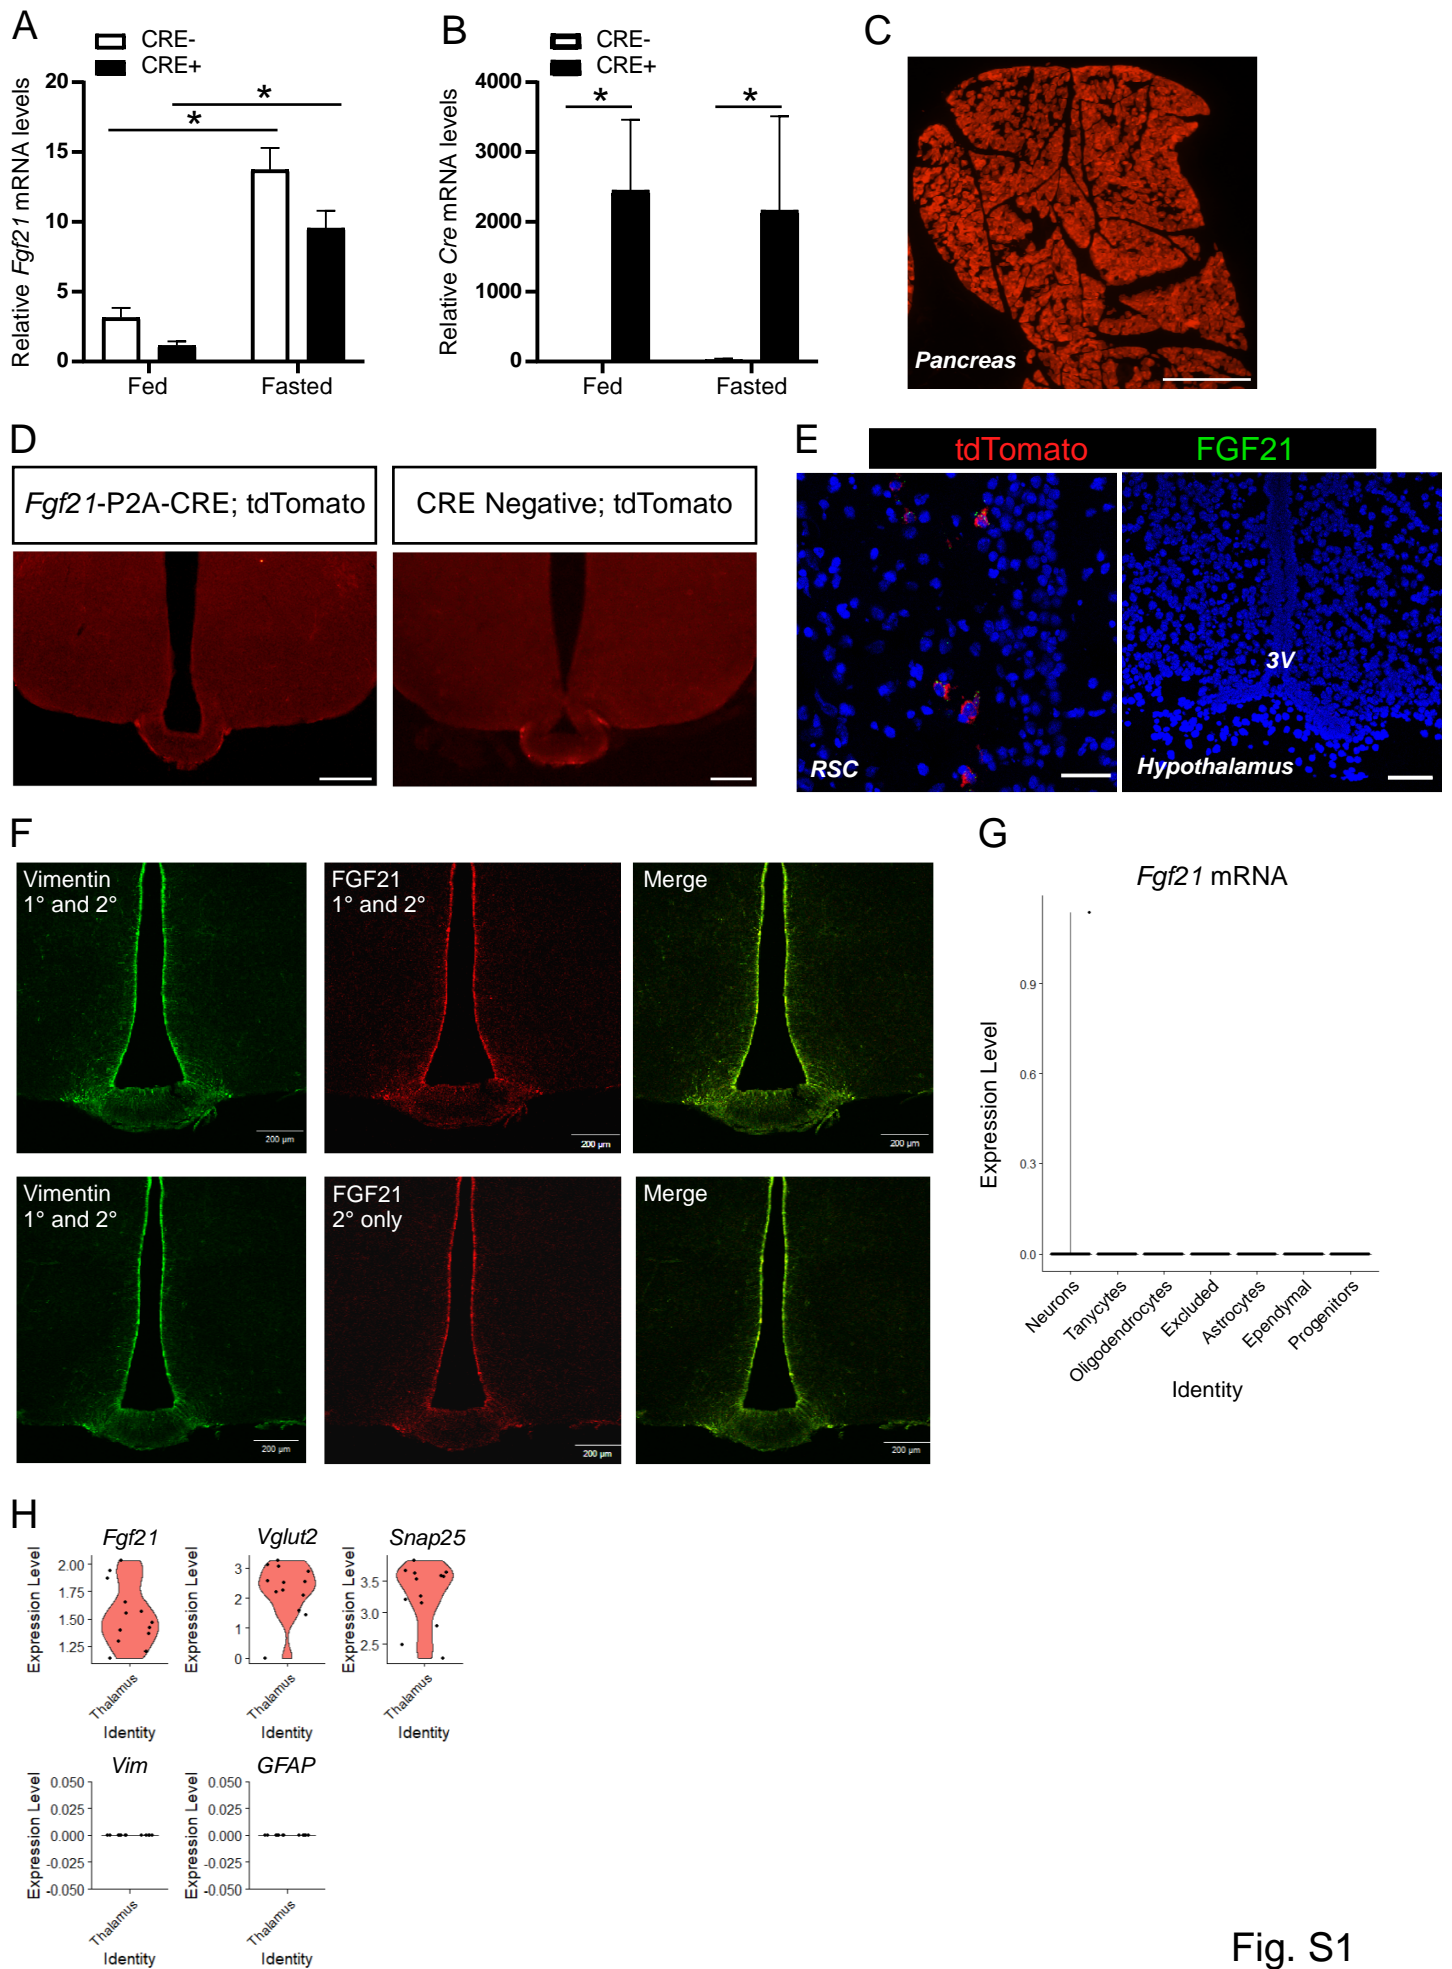

Fig. S1

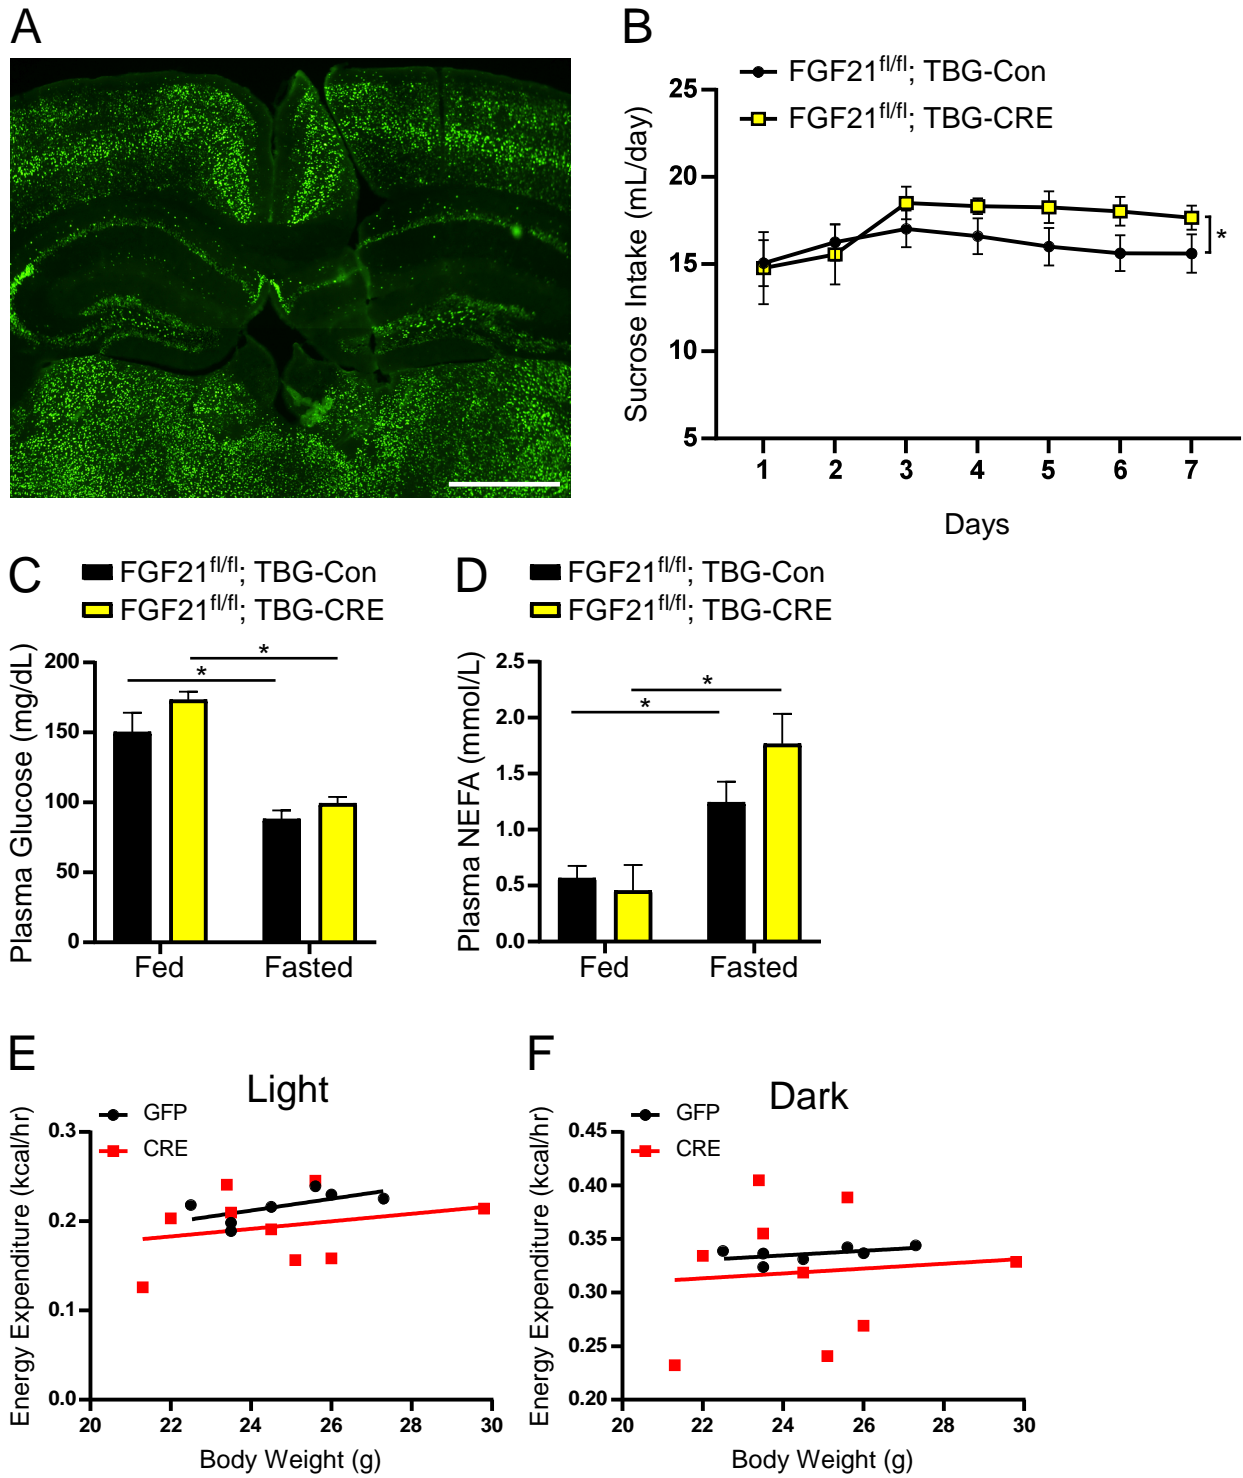

Fig. S2

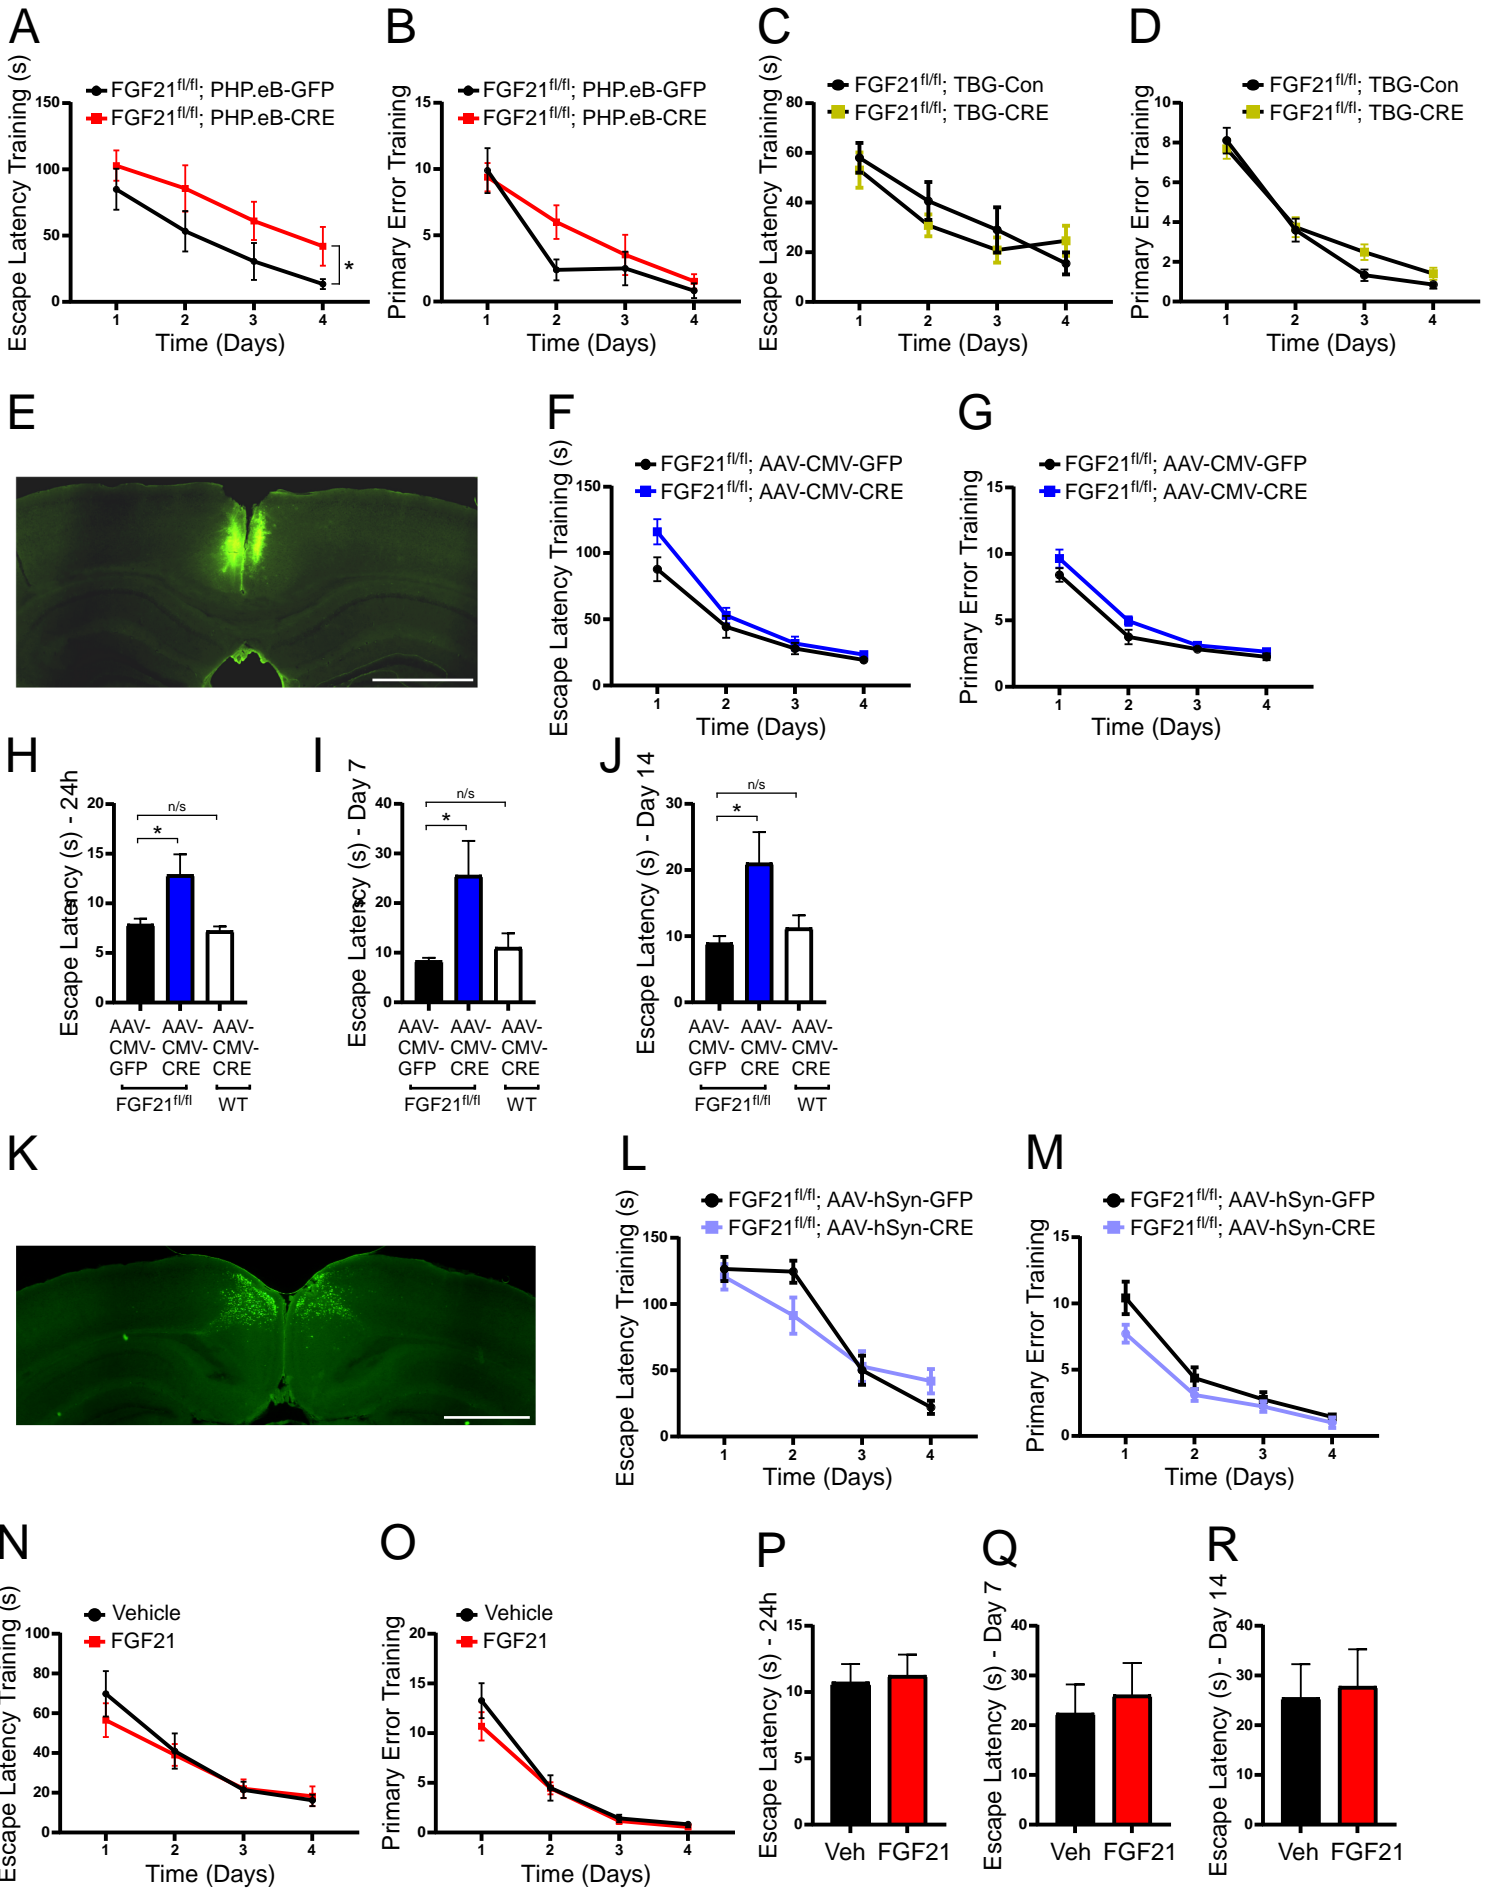

Figure S3



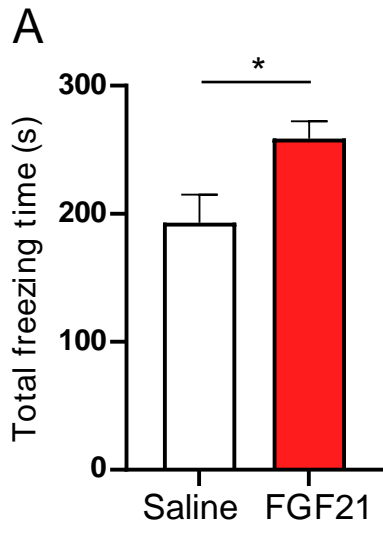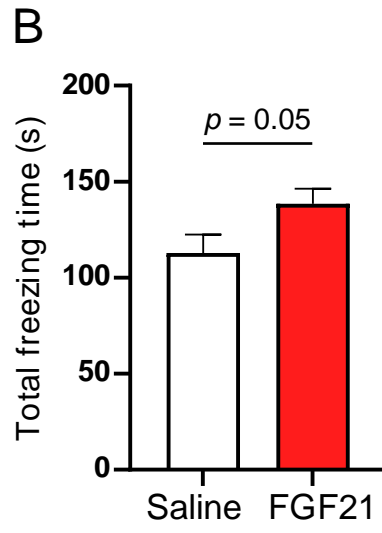

Figure S4
